# Supplementary figures and images for: Micropatterning neuronal networks
Source: Royal Society of Chemistry journal article supplement (doi:10.1039/c4an00608a), 2014-01-01

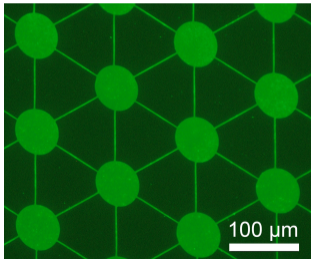

Supplement: c4an00608a4.pdf [file c4an00608a4.pdf]

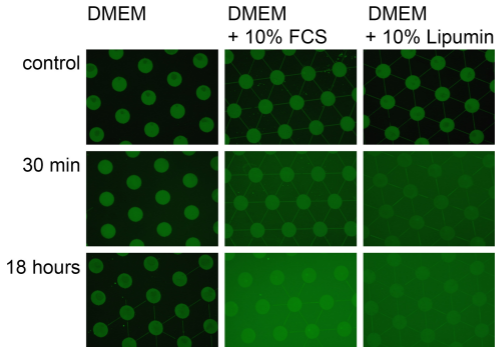

Supplement: c4an00608a5.pdf [file c4an00608a5.pdf]

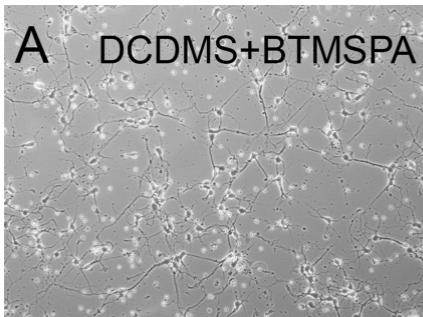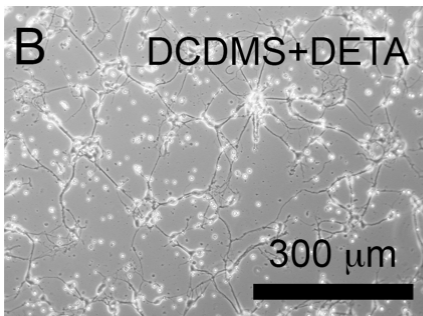

Supplement: c4an00608a7.pdf [file c4an00608a7.pdf]
